# Supplementary material for: Water oxidation by a noble metal-free photoanode modified with an organic dye and a molecular cobalt catalyst
Source: Royal Society of Chemistry journal article supplement (doi:10.1039/d2ta00573e), 2022-01-01
Supplement: d2ta00573e1.pdf [file d2ta00573e1.pdf]

## Supporting Information

### **Water Oxidation with a Noble Metal-Free Photoanode Modified with an Organic Dye and a Molecular Cobalt Catalyst**

Yong Zhu, Degao Wang, Wenjun Ni, Gagik G. Gurzadyan, Licheng Sun,  
Thomas J. Meyer, \* and Fei Li\*

## Materials

All synthetic reactions were carried out under N<sub>2</sub> atmosphere with standard Schlenk techniques. According to standard methods, solvents were dried and purified prior to use. 4-(di-p-tolylamino)benzaldehyde (≥ 98%), bromotrimethylsilane (≥ 98.0%), diethyl cyanomethyl phosphonate (≥ 98%, GC), cobalt nitrate hexahydrate (Co(NO<sub>3</sub>)<sub>2</sub>·6H<sub>2</sub>O, 99%) (≥ 99.0%), pyridine (≥ 99.0%) were purchased from Aladdin. 4-Pyridylacetonitrile hydrochloride (≥ 95.0%) were purchased from J&K chemical company. All other chemicals are commercially available. High purity water (18.2 MΩ·cm) supplied by a Milli-Q system (Millipore, Direct-Q 3 UV) was used in all experiments.

## Characterization

<sup>1</sup>H NMR spectra were collected at 298 K using a Bruker DRX-500 instrument. Electrospray ionization mass spectra were recorded on an LTQ Orbitrap XL Micromass spectrometer (Thermo Scientific, USA). Electrochemical measurements were taken with a CHI 760E electrochemical potentiator (Shanghai Chenhua, China). Photoluminescence spectra were analyzed with a Fluorolog FL-3-22 fluorometer from Horiba-Jobin-Yvon Ltd. equipped with a 450 W Xe lamp and two analyzing monochromators.

## X-ray crystallography

Single-crystals of **D1** were obtained by slow diffusion of diethyl ether in **D1** DCM solutions. Intensities were collected on a Bruker SMART APEX CCD diffractometer with graphite monochromator Mo-Kα (λ = 0.71073 Å) using the SMART and SAINT programs. The structure was solved by direct methods and refined on F<sub>2</sub> by full-matrix least-squares methods with SHELXTL version 5.1.37. All non-hydrogen atoms were refined anisotropic ally. All hydrogen atoms were set geometrically and constrained to ride on their carrier atoms. The structure has been deposited to the CCDC with the deposition number 2027522. The detailed crystal data are given in Table S1.

**Table S1.** Crystallographic Data for **D1**

| Compound                          | CCM-1                                                                                         |
|-----------------------------------|-----------------------------------------------------------------------------------------------|
| Empirical formula                 | C <sub>28</sub> H <sub>23</sub> N <sub>3</sub>                                                |
| Formula weight                    | 401.49 g/mol                                                                                  |
| Temperature                       | 170 K                                                                                         |
| Crystal system                    | triclinic                                                                                     |
| Space group                       | P -1 (2)                                                                                      |
| Unit cell dimensions              | a = 6.8605(3) Å; α = 92.836°<br>b = 7.6642(3) Å; β = 93.632°<br>c = 20.8113(8) Å; γ = 99.805° |
| Volume                            | 1074.09(8) nm <sup>3</sup>                                                                    |
| Z                                 | 21                                                                                            |
| Density (calculated)              | 1.397 g/cm <sup>3</sup>                                                                       |
| Absorption coefficient            | 0.126 mm <sup>-1</sup>                                                                        |
| F (000)                           | 424                                                                                           |
| Crystal size                      | 0.5 x 0.5 x 0.5 mm <sup>3</sup>                                                               |
| Theta range for data collection   | 5.404 to 65.278                                                                               |
| Index ranges                      | -9 ≤ h ≤ 10, -11 ≤ k ≤ 11, -30 ≤ l ≤ 28                                                       |
| Reflections collected             | 25370                                                                                         |
| Independent reflections           | 6792 [R <sub>int</sub> = 0.0585, R <sub>sigma</sub> = 0.0748]                                 |
| Completeness to theta = 27.54°    | 99.5 %                                                                                        |
| Refinement method                 | Full-matrix least-squares on F <sup>2</sup>                                                   |
| Data / restraints / parameters    | 6792/0/127                                                                                    |
| Goodness-of-fit on F <sup>2</sup> | 1.091                                                                                         |
| Final R indices [I > 2σ(I)]       | R <sub>1</sub> = 0.1107, wR <sub>2</sub> = 0.2745                                             |
| R indices (all data)              | R <sub>1</sub> = 0.1788, wR <sub>2</sub> = 0.3177                                             |
| Largest diff. peak and hole       | 1.03/-0.70 e.Å                                                                                |

**Emission spectral fitting procedure**

Emission spectra of TiO<sub>2</sub>|**D1** and TiO<sub>2</sub>|**D2** were first converted to intensity units of quanta per second with the x-axis expressed as wavenumbers and then fit using a single-mode Franck-Condon analysis, equation S1

$$I(\tilde{\nu}) = \sum_{\nu=0}^{10} \left\{ \left( \frac{E_0 - \nu \hbar \omega}{E_0} \right)^3 (S^\nu) \times \exp \left[ -4 \ln \left( \frac{2}{\Delta \tilde{\nu}_{0,1/2}} \right) \left( \frac{\tilde{\nu} - E_0 + \nu \hbar \omega}{\Delta \tilde{\nu}_{0,1/2}} \right)^2 \right] \right\} \quad (\text{Equation S1})$$

In this equation,  $\hbar\omega$  is the quantum vibrational energy spacing of the single acceptor mode of medium frequency, the value of  $\hbar\omega$  was obtained by previously described method.<sup>1</sup>  $S$  is the Huang-Rhys factor. The fitting was performed in MATLAB (version R2018a) with 11 vibrational levels included in the summation.

## O<sub>2</sub> Measurements

Faradaic efficiencies (FE) for O<sub>2</sub> evolution were evaluated by the use of a previously described collector–generator (C-G) technique. The technique was carried out at room temperature by using a CHI 760E electrochemical analyzer, two working electrodes were positioned in parallel at a separation distance of 1 mm. At a constant bias of 0.6 V vs. NHE with illumination above 400 nm (100 mW cm<sup>-2</sup>) photoelectrochemical O<sub>2</sub> generation at the generator was monitored at a fluorine-doped tin oxide (FTO) collector cathode with a pre-established collection efficiency of 70%. The FE for O<sub>2</sub> formation was calculated from current–time plots by using equation S2. In this equation,  $Q_{\text{Coll}}$  is the integrated charge passed at the collector electrode and  $Q_{\text{Gen}}$  the total charge passed at the generator electrode.

$$FE(\%) = \frac{Q_{\text{Coll}}/Q_{\text{Gen}}}{70\%} \times 100\% \quad (\text{Equation S2})$$

Table S2. Time coefficients and relative amplitudes of TR-PL decay traces in Figure 2

| Sample                                     | $\tau_1$ , ns | $A_1$ | $\tau_2$ , ns | $A_2$ | $\tau_3$ , ns | $A_3$ | $\langle\tau\rangle_{av}^{a)}$ , ns |
|--------------------------------------------|---------------|-------|---------------|-------|---------------|-------|-------------------------------------|
| Al <sub>2</sub> O <sub>3</sub>   <b>D1</b> | 0.13          | 0.66  | 0.59          | 0.28  | 2.4           | 0.06  | 0.39                                |
| TiO <sub>2</sub>   <b>D1</b>               | 0.01          | 0.71  | 0.11          | 0.27  | 0.48          | 0.04  | 0.056                               |
| Al <sub>2</sub> O <sub>3</sub>   <b>D2</b> | 0.16          | 0.60  | 0.64          | 0.37  | 2.0           | 0.04  | 0.40                                |
| TiO <sub>2</sub>   <b>D2</b>               | 0.02          | 0.92  | 0.13          | 0.08  | 0.75          | 0.01  | 0.04                                |

a) The values of  $\langle\tau\rangle_{av}$  were determined with  $\langle\tau\rangle_{av} = A_1\tau_1 + A_2\tau_2 + A_3\tau_3$ .

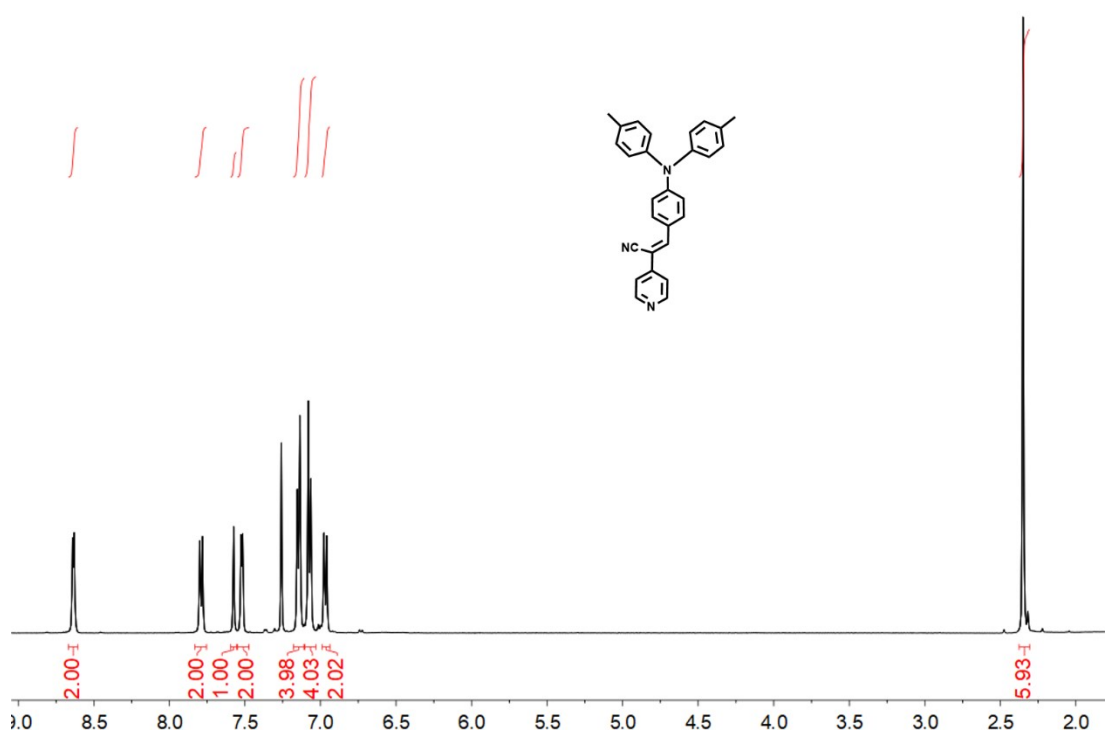

Fig.S1 <sup>1</sup>H NMR spectrum of complex **D1** in CDCl<sub>3</sub>.

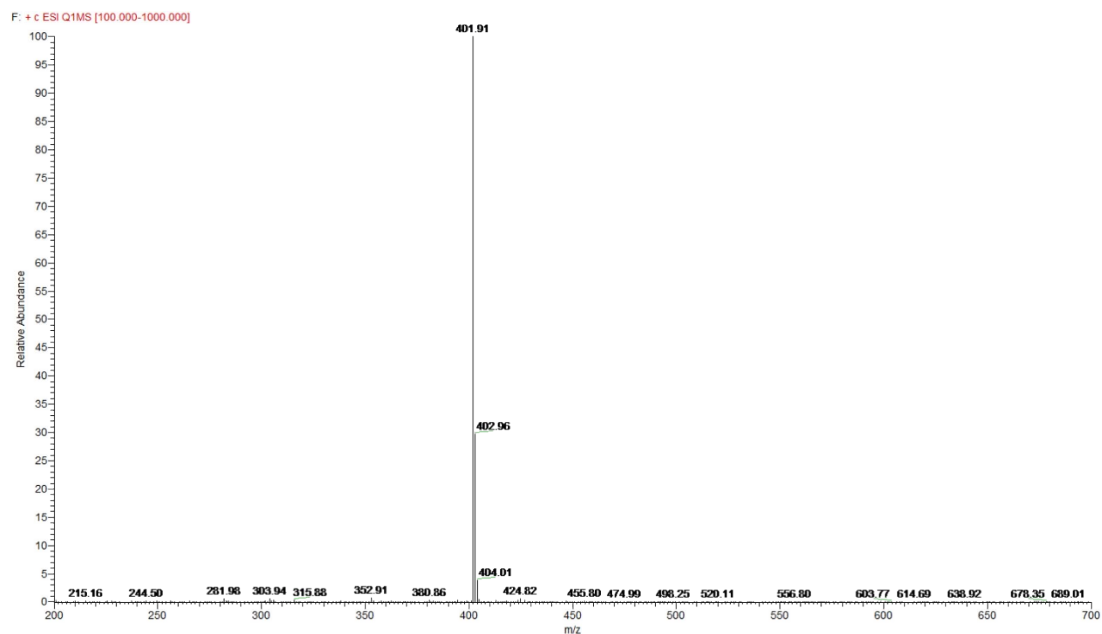

Fig. S2 ESI-MS spectrum of complex D1 in CH<sub>3</sub>OH.

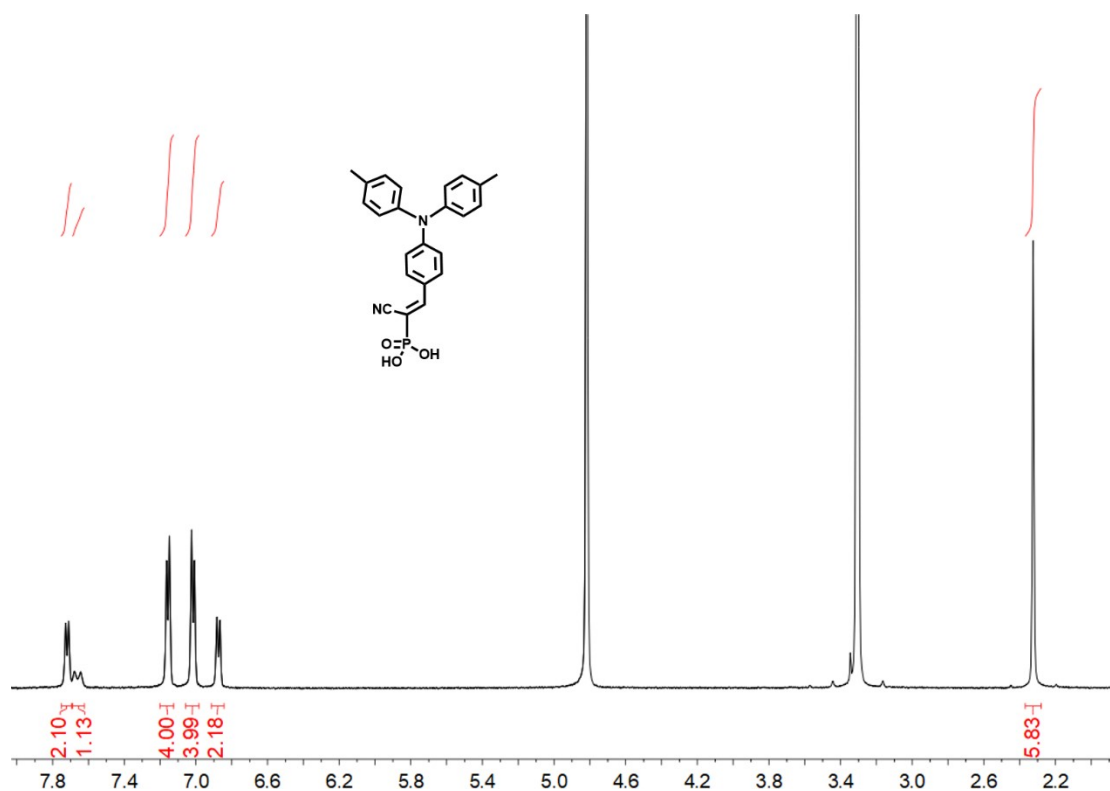

Fig. S3 <sup>1</sup>H NMR spectrum of complex D2 in CD<sub>3</sub>OD.

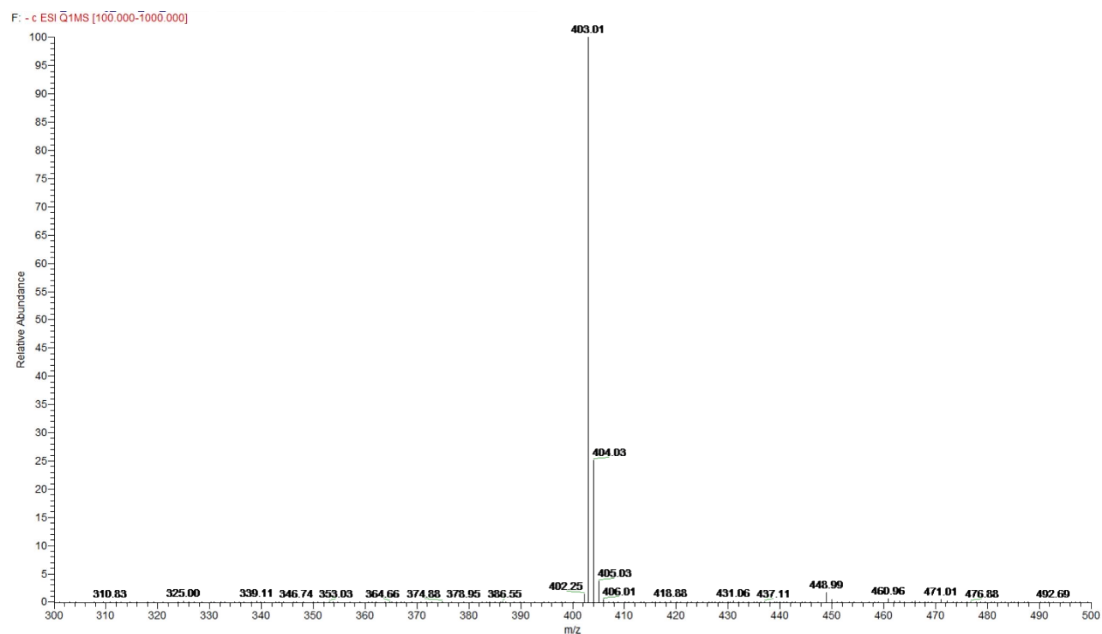

**Fig S4** ESI-MS spectrum of complex **D2** in  $\text{CH}_3\text{OH}$ .

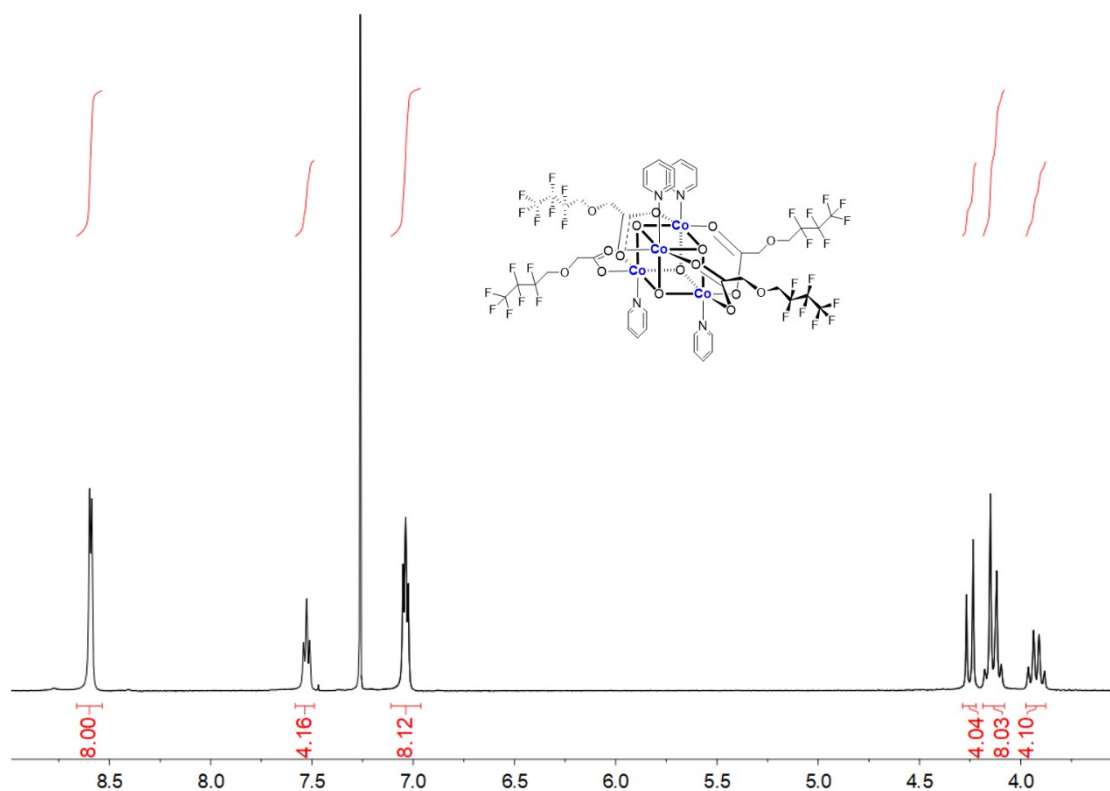

**Fig S5**  $^1\text{H}$  NMR spectrum of complex **CoF** in  $\text{CDCl}_3$ .

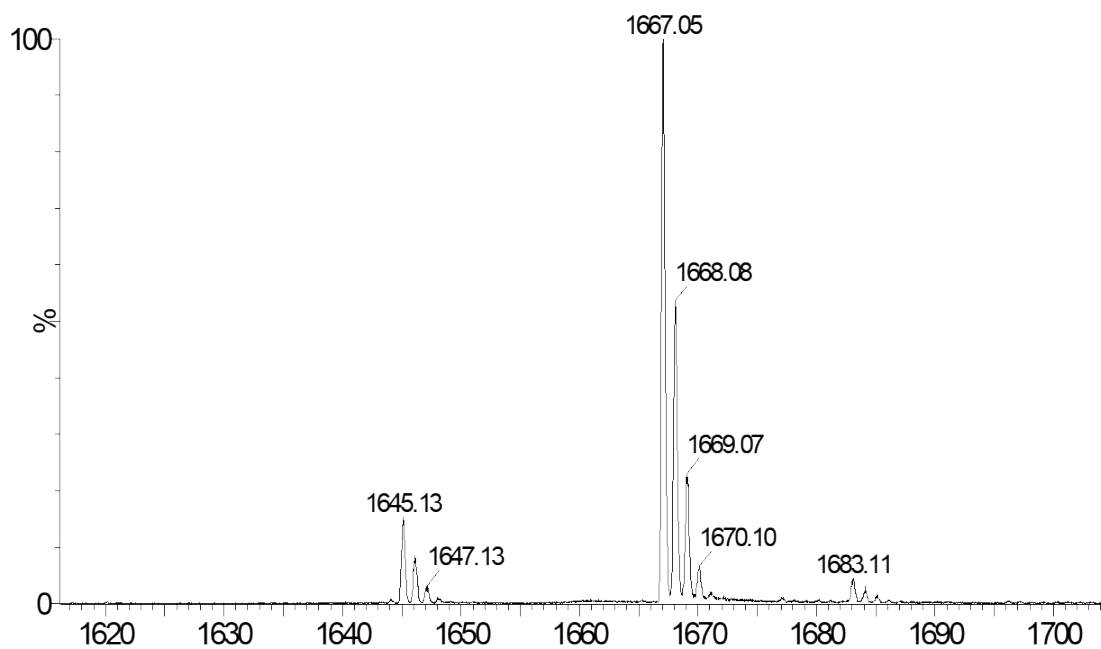

**Fig. S6** ESI-MS spectrum of complex **CoF** in  $\text{CH}_3\text{OH}$ .

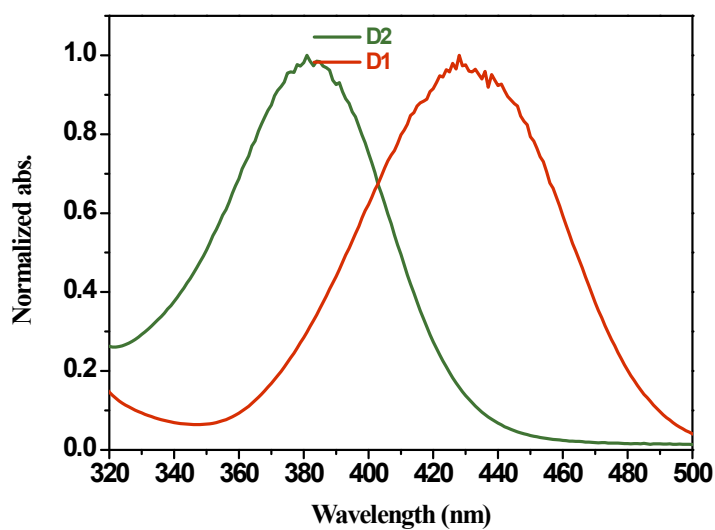

**Fig. S7** Normalized UV-Vis absorption spectra for **D1** (red) and **D2** (green) in THF.



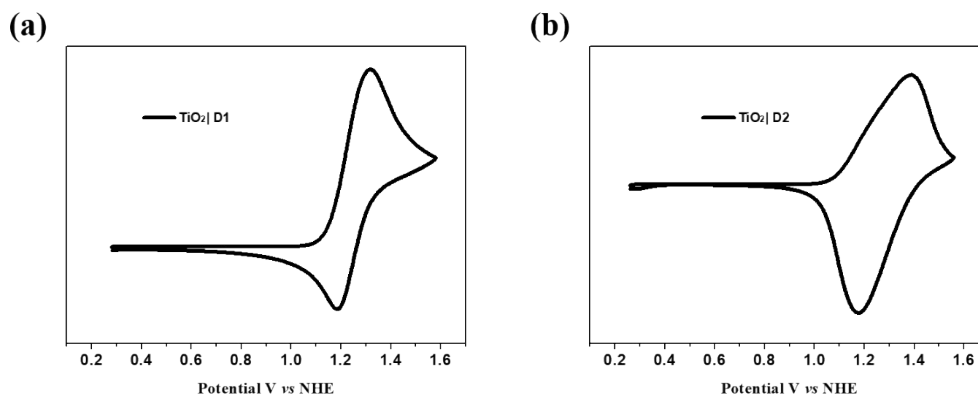

**Fig. S8** Cyclic voltammograms for **D1** (a) and **D2** (b) on TiO<sub>2</sub> in acetonitrile with 0.1 M TBAPF<sub>6</sub> and a scan rate of 50 mV s<sup>-1</sup> (calibrated with Fc/Fc<sup>+</sup> as an external reference and converted to NHE by addition of 0.63 V).

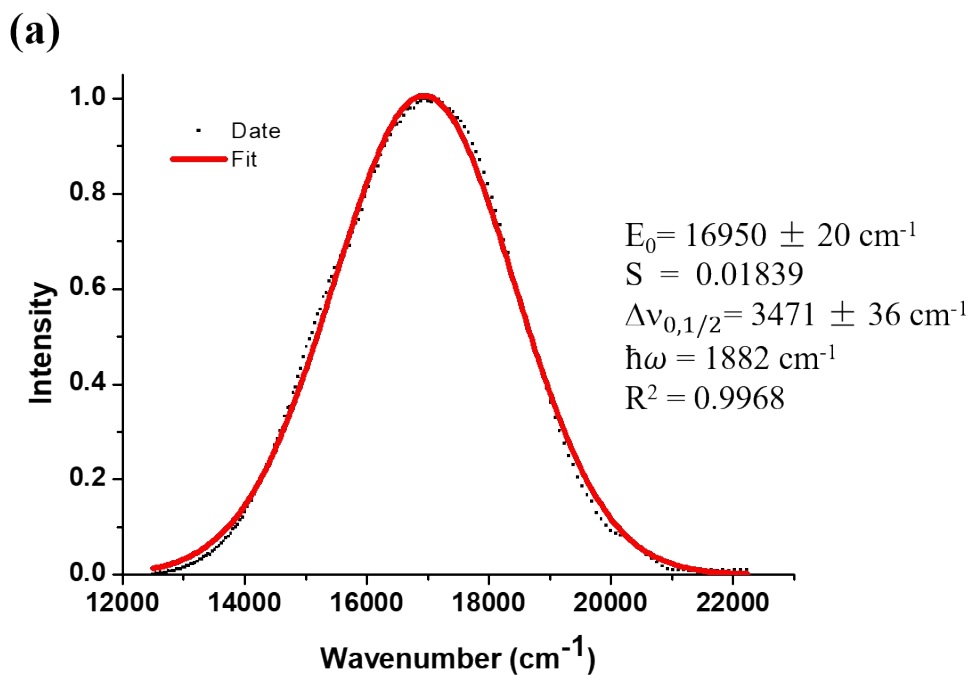

(b)

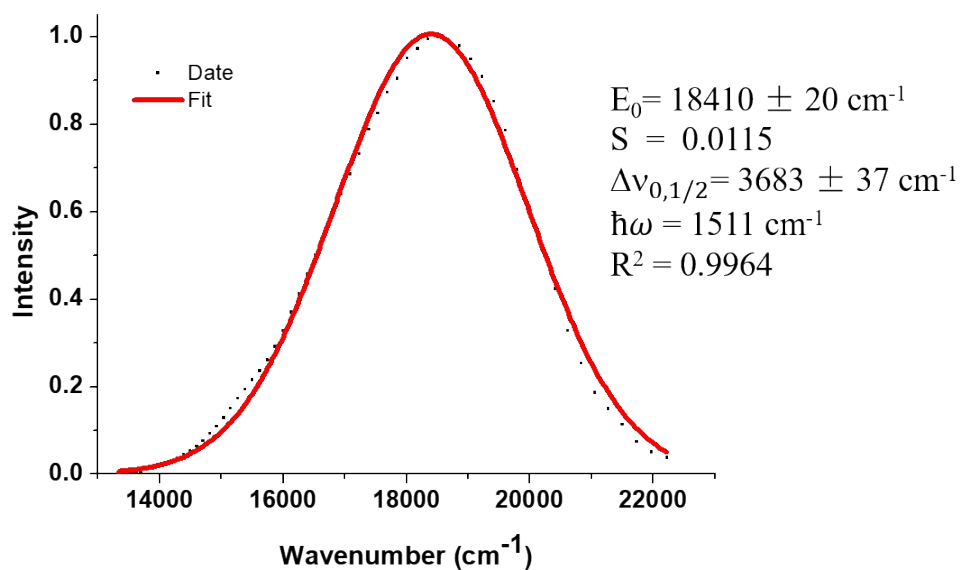

**Fig. S9** Emission spectra of **D1** (a) and **D2** on  $\text{TiO}_2$  (b) immersed in pH 7 phosphate buffer and fitting thereof.

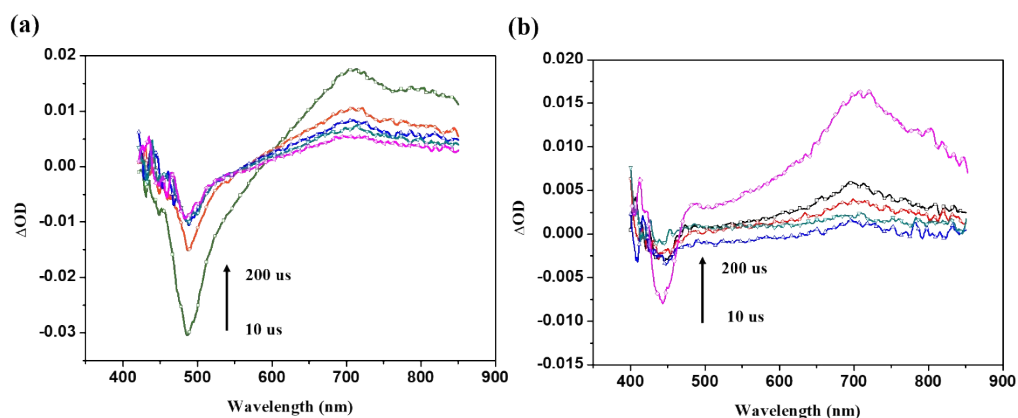

**Fig. S10** Transient absorption difference spectra following 532 nm pulsed laser excitation of  $\text{TiO}_2$ |**D1** (a) and **D2** (b) in pH 7 phosphate buffer from 10 to 200  $\mu\text{s}$ .

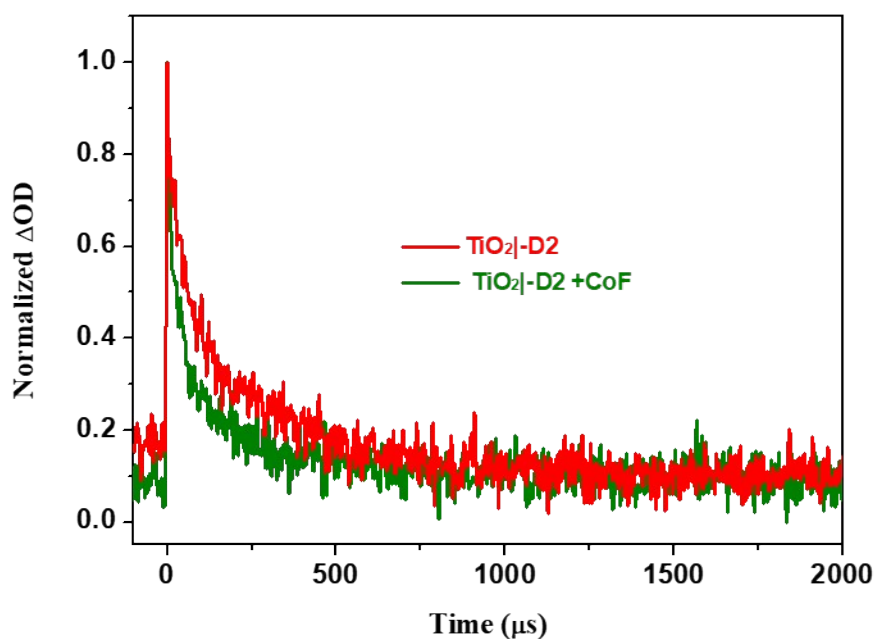

**Fig.S11** Normalized transient absorption time traces at 700 nm comparing on TiO<sub>2</sub>|D1 (red) and on TiO<sub>2</sub>|D1 CoF (green), at a constant bias of 0.4 V vs. NHE immersed in pH 7 phosphate buffer.

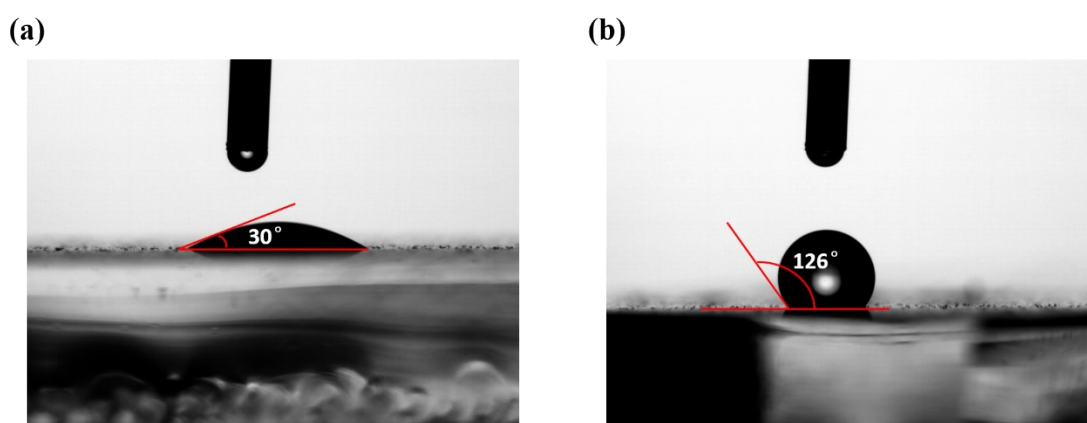

**Fig.S12** Wettability of TiO<sub>2</sub>|D1 surface (a); Wettability of TiO<sub>2</sub>|D1 CoF surface (b).

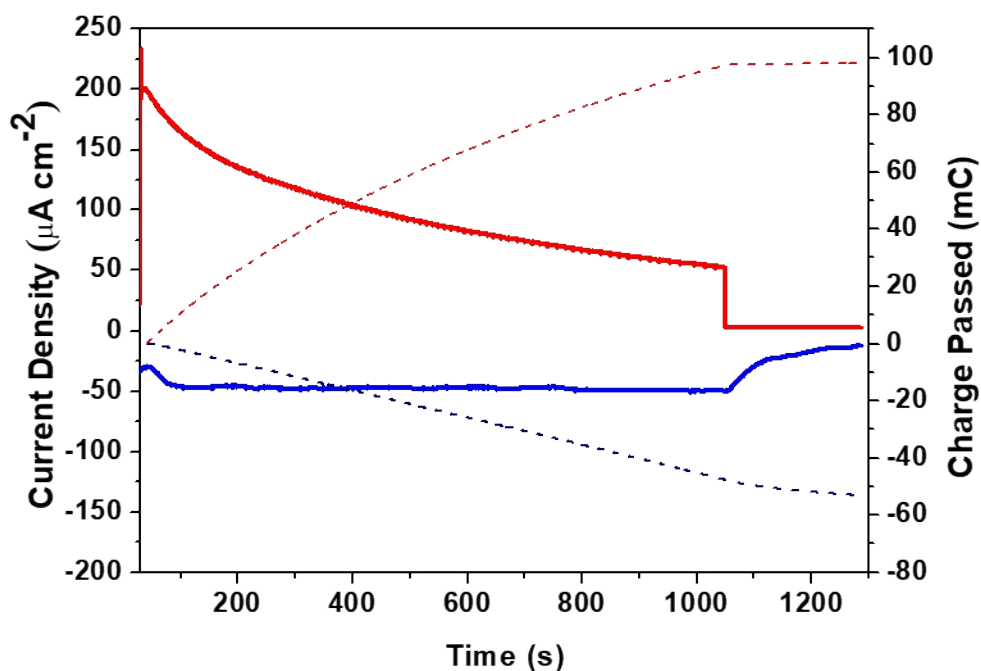

**Fig.S13** Current density and charge passed from a collector–generator cell, TiO<sub>2</sub>|D1 CoF, pH 7 phosphate buffer (0.1 M Na<sub>2</sub>HPO<sub>4</sub>/NaH<sub>2</sub>PO<sub>4</sub>, 0.4 M NaClO<sub>4</sub>) under ~100mW cm<sup>-2</sup> white light (< 400nm) illumination for 1000 s with an applied bias of 0.6 V vs. NHE. The solid traces show photocurrents, and the dashed lines show the charge passed for the generator (red) and collector (blue) electrodes.

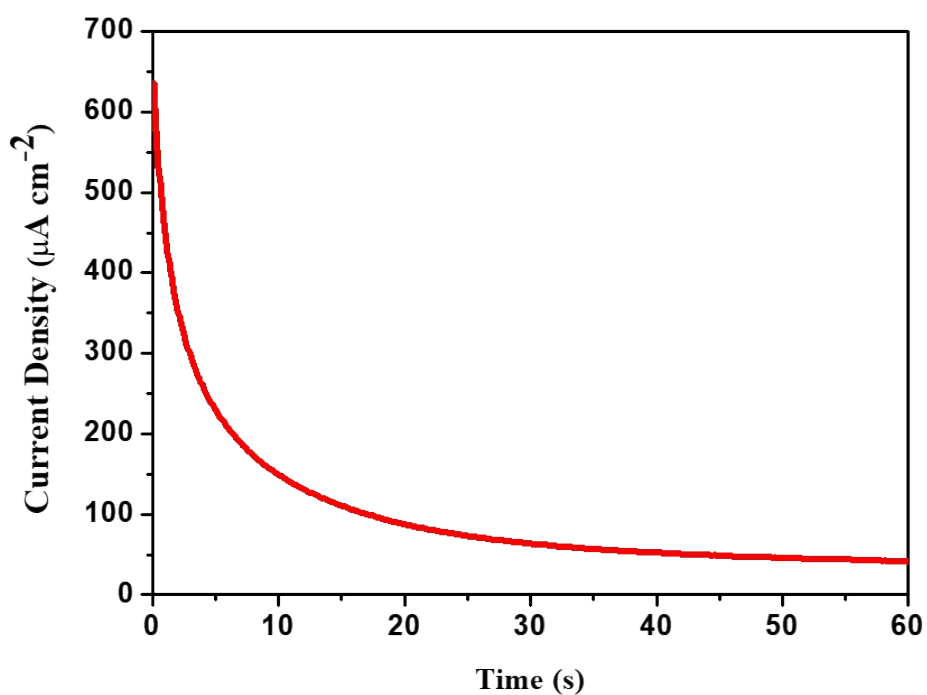

**Fig. S14** Current density-time traces for TiO<sub>2</sub>|RuP, CoF with illumination above 400 nm at 100 mW cm<sup>-2</sup> in a pH 7 0.1 M phosphate buffer containing 0.5 M NaClO<sub>4</sub> at a constant bias of 0.6 V vs. NHE.

The calculated structures

D1

|   |             |             |             |
|---|-------------|-------------|-------------|
| C | -3.14810900 | -1.23316300 | -0.00384900 |
| C | -2.88426100 | -2.29456800 | 0.86564000  |
| C | -3.69993200 | -3.41945200 | 0.85857100  |
| C | -4.80461400 | -3.51140900 | 0.00835900  |
| C | -5.06634300 | -2.43462400 | -0.84212200 |
| C | -4.24863300 | -1.31145200 | -0.86003900 |
| C | -2.96299000 | 1.20130200  | -0.01605800 |
| C | -2.53168900 | 2.20261700  | -0.89010000 |
| C | -3.16844100 | 3.43706200  | -0.90192600 |
| C | -4.25716900 | 3.70191200  | -0.06700900 |
| C | -4.68841300 | 2.68497300  | 0.78749300  |

|   |             |             |             |
|---|-------------|-------------|-------------|
| C | -4.04910000 | 1.45165800  | 0.82479200  |
| N | -2.32761100 | -0.07161700 | -0.00014500 |
| C | -0.93456200 | -0.17679700 | -0.00756800 |
| C | -0.13389400 | 0.84049300  | 0.54468900  |
| C | 1.24499000  | 0.74954000  | 0.53007800  |
| C | 1.89405500  | -0.36630600 | -0.03061400 |
| C | 1.08281700  | -1.38648700 | -0.55713100 |
| C | -0.29671900 | -1.30086400 | -0.55946300 |
| C | -5.67269000 | -4.74291500 | -0.00718600 |
| C | -4.92745100 | 5.05131600  | -0.07256400 |
| C | 3.33386200  | -0.55735300 | -0.09630300 |
| C | 4.36220000  | 0.29425600  | 0.13541200  |
| C | 5.78227200  | -0.11928100 | 0.02029400  |
| C | 6.18121200  | -1.44981400 | 0.18299500  |
| C | 7.52365200  | -1.77546600 | 0.03164100  |
| N | 8.48188300  | -0.89041100 | -0.25102500 |
| C | 8.09813600  | 0.38029700  | -0.38444700 |
| C | 6.78336300  | 0.81554400  | -0.25752500 |
| C | 4.15138800  | 1.68050500  | 0.45026500  |
| N | 4.03417500  | 2.80763200  | 0.69276900  |
| H | -2.03911400 | -2.22934200 | 1.54393100  |
| H | -3.48344200 | -4.23662200 | 1.54152500  |
| H | -5.92221100 | -2.47889500 | -1.51031800 |
| H | -4.46105300 | -0.48290700 | -1.52831400 |
| H | -1.69660000 | 2.00637800  | -1.55538100 |
| H | -2.82161400 | 4.20664100  | -1.58630600 |
| H | -5.53530500 | 2.86404400  | 1.44442400  |
| H | -4.39113300 | 0.67105600  | 1.49704700  |
| H | -0.60921600 | 1.70329000  | 0.99733300  |
| H | 1.81708600  | 1.54973600  | 0.98268200  |
| H | 1.55457000  | -2.26223500 | -0.99518800 |
| H | -0.89113800 | -2.09721600 | -0.99222200 |
| H | -5.67656100 | -5.23655400 | 0.96756500  |
| H | -6.70451800 | -4.49660200 | -0.26874200 |
| H | -5.31046300 | -5.46860300 | -0.74294900 |
| H | -4.90235700 | 5.50134100  | -1.06804500 |
| H | -5.97101400 | 4.97638900  | 0.24184800  |
| H | -4.42418900 | 5.74106700  | 0.61299800  |
| H | 3.62843500  | -1.55472300 | -0.41753900 |
| H | 5.46944600  | -2.22188200 | 0.45381000  |
| H | 7.84651200  | -2.80649700 | 0.15638800  |
| H | 8.88501500  | 1.09705400  | -0.60688800 |
| H | 6.54209800  | 1.86672200  | -0.37678800 |

|    |             |             |             |
|----|-------------|-------------|-------------|
| D2 |             |             |             |
| C  | 3.01847000  | -1.18798300 | -0.01930000 |
| C  | 2.76319400  | -2.23446500 | -0.90633800 |
| C  | 3.60563700  | -3.34108500 | -0.93802800 |
| C  | 4.72711000  | -3.42389700 | -0.11202700 |
| C  | 4.97832600  | -2.36001500 | 0.76037000  |
| C  | 4.13638000  | -1.25823700 | 0.81692000  |
| C  | 2.78337300  | 1.23988800  | 0.04033200  |
| C  | 2.37194200  | 2.21070000  | 0.95692300  |
| C  | 2.98782700  | 3.45572000  | 0.97394600  |
| C  | 4.03585700  | 3.76024200  | 0.10137900  |
| C  | 4.44830200  | 2.77273900  | -0.79600500 |
| C  | 3.82909700  | 1.52934900  | -0.83777200 |
| N  | 2.17121500  | -0.04520800 | 0.02035200  |
| C  | 0.78369500  | -0.17937500 | 0.05967700  |
| C  | -0.05130500 | 0.84308000  | -0.43322500 |
| C  | -1.42603600 | 0.71922900  | -0.39255500 |
| C  | -2.03497600 | -0.43365900 | 0.13857500  |
| C  | -1.19224200 | -1.45035000 | 0.62114300  |
| C  | 0.18407100  | -1.33587600 | 0.59002200  |
| C  | 5.64585100  | -4.61767000 | -0.15063000 |
| C  | 4.68311400  | 5.12079200  | 0.11316000  |
| C  | -3.46465200 | -0.65766800 | 0.22685300  |
| C  | -4.51439400 | 0.12351000  | -0.13038900 |
| P  | -6.15913900 | -0.52681600 | 0.16514700  |
| O  | -6.15928200 | -1.84447700 | 0.82856500  |
| O  | -6.98198100 | 0.60284800  | 0.97425600  |
| O  | -6.81793500 | -0.38871300 | -1.28617900 |
| C  | -4.42264100 | 1.42780000  | -0.70677800 |
| N  | -4.38454400 | 2.49042200  | -1.16850700 |
| H  | 1.90235200  | -2.17712700 | -1.56533000 |
| H  | 3.39316000  | -4.14981000 | -1.63175800 |
| H  | 5.84510700  | -2.40111300 | 1.41495500  |
| H  | 4.33837900  | -0.44070400 | 1.50184700  |
| H  | 1.56895300  | 1.98229100  | 1.65091800  |
| H  | 2.65757500  | 4.20190100  | 1.69161500  |
| H  | 5.26394400  | 2.98320700  | -1.48244100 |
| H  | 4.15560500  | 0.77114200  | -1.54261300 |
| H  | 0.39497100  | 1.73396900  | -0.85978200 |
| H  | -2.02927600 | 1.52495400  | -0.79307700 |
| H  | -1.63751300 | -2.34731000 | 1.04315700  |
| H  | 0.80641600  | -2.13168200 | 0.98229200  |
| H  | 5.32577100  | -5.33894600 | -0.90541200 |
| H  | 6.67186000  | -4.31784500 | -0.38348800 |

|   |             |             |             |
|---|-------------|-------------|-------------|
| H | 5.66700500  | -5.12915000 | 0.81648000  |
| H | 4.68115500  | 5.55104600  | 1.11761200  |
| H | 5.71749800  | 5.07021700  | -0.23462700 |
| H | 4.14717800  | 5.81431800  | -0.54315300 |
| H | -3.75389100 | -1.61794800 | 0.65387900  |
| H | -7.03655000 | 0.37268500  | 1.91125500  |
| H | -7.78173200 | -0.46224200 | -1.27310900 |

## references

1 M. S. Eberhart, D. Wang, R. N. Sampaio, S. L. Marquard, B. Shan, M. K. Brennaman, G. J. Meyer, C. Dares and T. J. Meyer, *J. Am. Chem. Soc.*, 2017, 139, 16248–16255.
